# Supplementary material
Source: Elsevier journal article supplement (https://comptes-rendus.academie-sciences.fr/geoscience/article/10.1016/j.crte.2007.03.006/file/attach/mmc2.pdf)
Supplement: mmc2 [file mmc2.pdf]

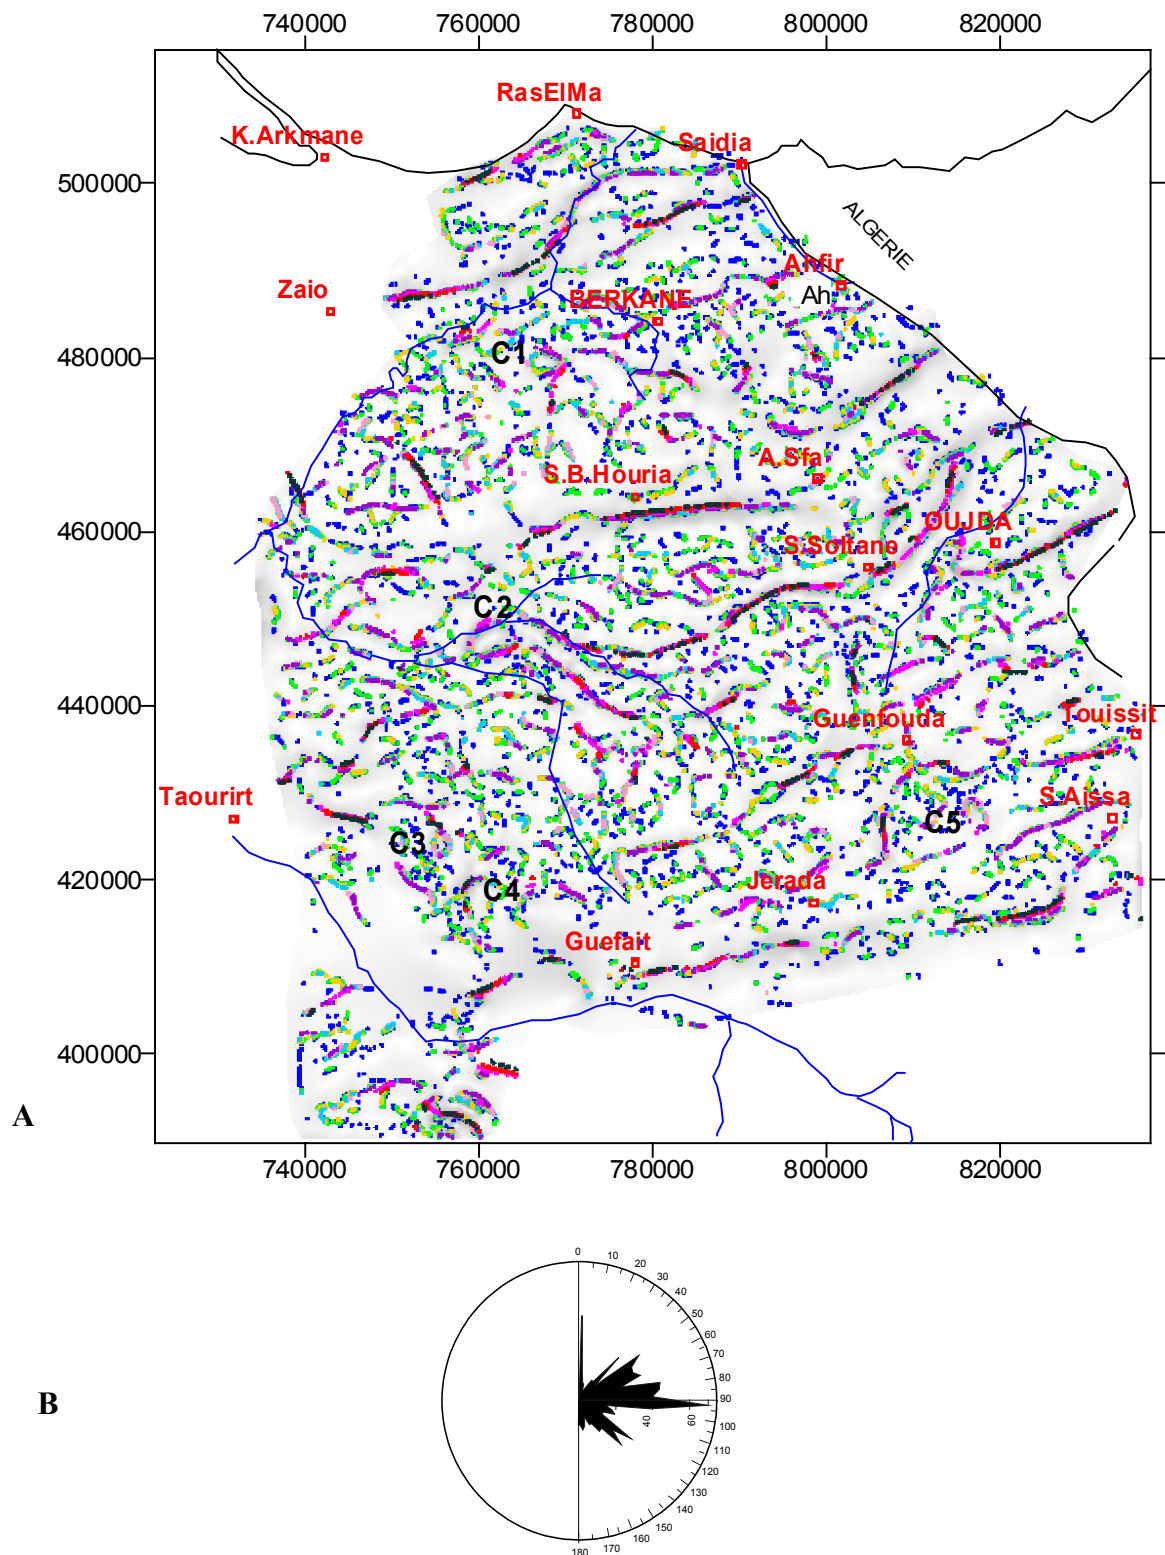

Fig.3 Superposition des maxima du gradient horizontal obtenus sur la carte de Bouguer et sur les cartes prolongées vers le haut à différentes altitudes (A) et rosace des fréquences des alignements interprétés comme étant des failles (B). ● maxima sur la Bouguer ; ● 250m ; ● 500m ; ● 750m ; ● 1000m ; ● 1500m ; ● 2000m ; ● 2500m ; ● 3000m.

Fig.3 Horizontal gradient maxima of the Bouguer anomaly and its upward continuations to different heights (A) and rose diagram of the alignments interpreted as faults (B).
